# Supplementary material for: Effect of essential oils as vitamin C preservatives and chia seed (Salvia hispanica) in the fortification of pineapple jam
Source: PubMed Central journal article supplement — Heliyon. 2024 Nov 29;10(23):e40711. doi: 10.1016/j.heliyon.2024.e40711 (PMC11664267; doi:10.1016/j.heliyon.2024.e40711), 2024-11-29
Supplement: mmc1.pdf [file mmc1.pdf]

## General acceptability test

### Score value assigned:

Liked extremely = 9, like very much = 8, like moderately =7, like slightly = 6, neither like nor dislike = 5, dislike slightly = 4, dislike moderately =3, dislike very much = 2 , dislike extremely = 1

| Serial No. | Treatment                     | Texture | aroma | Taste | Spreadability | Overall acceptability |
|------------|-------------------------------|---------|-------|-------|---------------|-----------------------|
| 1          | C <sub>0</sub> E <sub>0</sub> | 7       | 6     | 6     | 7             | 6                     |
| 2          | C <sub>0</sub> E <sub>1</sub> | 7       | 7     | 6     | 7             | 6                     |
| 3          | C <sub>0</sub> E <sub>2</sub> | 7       | 8     | 6     | 7             | 6                     |
| 4          | C <sub>1</sub> E <sub>0</sub> | 8       | 6     | 8     | 9             | 7                     |
| 5          | C <sub>1</sub> E <sub>1</sub> | 8       | 7     | 8     | 9             | 7                     |
| 6          | C <sub>1</sub> E <sub>2</sub> | 8       | 8     | 8     | 9             | 7                     |
| 7          | C <sub>2</sub> E <sub>0</sub> | 9       | 6     | 8     | 8             | 8                     |
| 8          | C <sub>2</sub> E <sub>1</sub> | 9       | 7     | 8     | 8             | 8                     |
| 9          | C <sub>2</sub> E <sub>2</sub> | 9       | 8     | 8     | 8             | 8                     |
| 10         | C <sub>3</sub> E <sub>0</sub> | 8       | 6     | 9     | 8             | 9                     |
| 11         | C <sub>3</sub> E <sub>1</sub> | 8       | 7     | 9     | 8             | 9                     |
| 12         | C <sub>3</sub> E <sub>2</sub> | 8       | 8     | 9     | 8             | 9                     |
| 13         | C <sub>4</sub> E <sub>0</sub> | 6       | 6     | 7     | 6             | 8                     |
| 14         | C <sub>4</sub> E <sub>1</sub> | 6       | 7     | 7     | 6             | 8                     |
| 15         | C <sub>4</sub> E <sub>2</sub> | 6       | 8     | 7     | 6             | 8                     |

### Participants list :

Tasnim gultekin

Nazmul haque

Hosne ara

Sania sultana

Nusrat jahan

Sadia afrin

Emrul kayes

Sahjahan ali

Israt jahan

Sabbir sajjib
